# Supplementary material for: Predictive Validity of Motor Fitness and Flexibility Tests in Adults and Older Adults: A Systematic Review
Source: MDPI journal article supplement (doi:10.3390/jcm11020328), 2022-01-10
Supplement: s1 [file s1]

**Supplementary Figure S1.** Number of studies reporting predictive validity or lack of predictive validity of the included motor fitness and flexibility tests for different health outcomes.

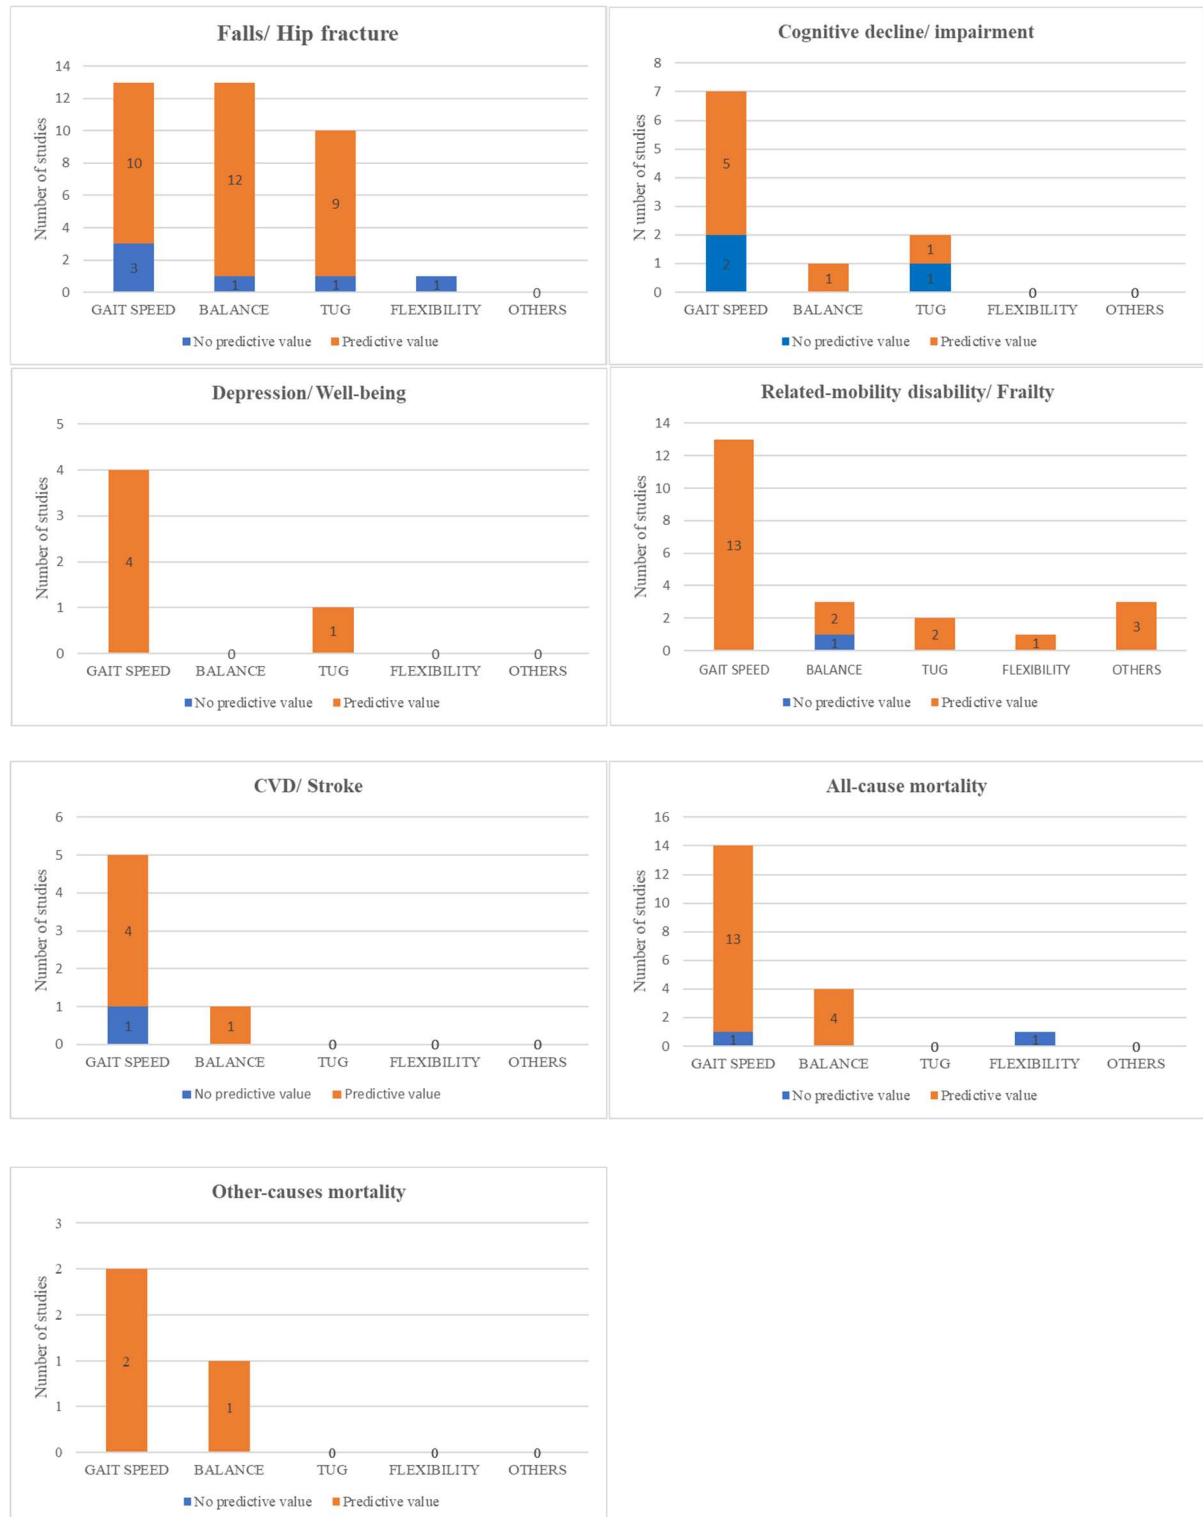

CVD, Cardiovascular Disease; TUG, Timed Up&Go test; “Other” includes: maximum step length, speed of movement and stair mounting test.
