# Supplementary material for: Predictive Validity of Motor Fitness and Flexibility Tests in Adults and Older Adults: A Systematic Review
Source: MDPI journal article supplement (doi:10.3390/jcm11020328), 2022-01-10
Supplement: s1 [file s1]

**Supplementary Table S6.** Systematic reviews/meta-analysis on predictive validity of motor fitness tests for adverse health outcomes in adults and older adults.

| Author                                  | Type of review; number of studies (k) | Sample age | Fitness tests                                                                             | Health outcomes                | Main results                                                                                                      | Conclusions                                                                                          |
|-----------------------------------------|---------------------------------------|------------|-------------------------------------------------------------------------------------------|--------------------------------|-------------------------------------------------------------------------------------------------------------------|------------------------------------------------------------------------------------------------------|
| <b>Falls</b>                            |                                       |            |                                                                                           |                                |                                                                                                                   |                                                                                                      |
| Cavanaugh et al. 2018 [1]               | Systematic review<br>K = 3            | ≥60        | Gait speed (6m)<br>Dynamic balance (functional reach test, cm (FRT))<br>Timed Up&Go (TUG) | Falls                          | Slower gait speed (≥6s in total): RR=1.8 (1.2-2.6).<br>FRT: $r=0.013$ , $p>0.05$ .<br>TUG: $r=0.143$ , $p>0.05$ . | Slower gait speed identified falls.<br>Neither the FRT nor TUG test and falls risk were significant. |
| Van Kan et al. 2009 [2]                 | Systematic review<br>K = 4            | ≥65        | Gait speed (5m, 6m and 10m)                                                               | Falls                          | Slower gait speed (<0.67m/s): RR ranging from 0.2 to 5.4 (0.1-14.3).                                              | Slow gait speed was an independent predictor of falls.                                               |
| <b>Cognitive decline and impairment</b> |                                       |            |                                                                                           |                                |                                                                                                                   |                                                                                                      |
| Quan et al. 2017 [3]                    | Meta-analysis<br>K = 17               | ≥60        | Gait speed (2.4m, 3m, 4m, 4.9m, 6m, 7m, 8m, 9m, 10m, 60m and 400m)                        | Cognitive decline and dementia | Slower gait speed: RR=1.9 (1.5–2.3), for cognitive decline.<br>Slower gait speed: RR=1.7 (1.4–1.9), for dementia. | Slow or decreased gait speed predicted elevated risk of cognitive decline and dementia.              |

|                                            |                                                        |       |                                                                                          |                                             |                                                                                                                                                                                                                                          |                                                                                            |
|--------------------------------------------|--------------------------------------------------------|-------|------------------------------------------------------------------------------------------|---------------------------------------------|------------------------------------------------------------------------------------------------------------------------------------------------------------------------------------------------------------------------------------------|--------------------------------------------------------------------------------------------|
|                                            |                                                        |       |                                                                                          |                                             | Every 1 m/s decrement in gait speed: RR=1.1 (1.1–1.2), for dementia.                                                                                                                                                                     |                                                                                            |
| Van Kan et al. 2009 [2]                    | Systematic review<br>K = 7                             | ≥65   | Gait speed (2.4m, 4m, 4.6m, 5m and 6m)                                                   | Cognitive decline                           | Slower gait speed (<1m/s): RR ranging from 0.4 to 5.6 (0.2-12.6).                                                                                                                                                                        | Gait speed at usual pace predicted cognitive impairment.                                   |
| Grande et al. 2019 [4]                     | Systematic review<br>K = 39                            | 62-93 | Gait speed (2.4m, 3m, 4m, 4.5m, 4.8m, 5m, 5.6m, 6m, 7m, 7.6m, 9m, 15m, 40m)              | Cognitive decline and/or dementia           | Slower gait speed (<0.8m/s): RR ranging from 1.1 to 5.0 (0.53-48.2).                                                                                                                                                                     | Slow or decreased gait speed predicted elevated risk of cognitive decline and/or dementia. |
| Peel et al. 2019 [5]                       | Systematic review<br>K = 36<br>Meta-analysis<br>K = 27 | ≥60   | Gait speed (2.4m, 3.7m, 4m, 4.6m, 5m, 5.3m, 5.6m, 6m, 7m, 7.6m, 7.9m, 8m, 10m, 20m, 30m) | Cognitive decline and dementia              | Parameter estimate=-0.1 (-0.1, -0.1) m/s, $p<0.001$ , for cognitive decline.<br>Parameter estimate=-0.2 (-0.2, -0.2) m/s, $p<0.001$ , for mild dementia.<br>Parameter estimate=-0.4 (-0.5, -0.3) m/s, $p<0.001$ , for moderate dementia. | Slow or decreased gait speed predicted elevated risk of cognitive decline and dementia.    |
| <b>Mobility limitations and disability</b> |                                                        |       |                                                                                          |                                             |                                                                                                                                                                                                                                          |                                                                                            |
| Cavanaugh et al. 2018 [1]                  | Systematic review<br>K = 6                             | ≥60   |                                                                                          | Disability in instrumental daily activities | Usual gait speed (<1m/s): HR=1.5 (1.3-1.7), for persistent mobility disability; and: HR=1.5 (1.2-                                                                                                                                        | Slower gait speed was a predictor                                                          |

|  |                                                                                                                                                  |                              |                                                                                                                                                         |                                                                                                    |
|--|--------------------------------------------------------------------------------------------------------------------------------------------------|------------------------------|---------------------------------------------------------------------------------------------------------------------------------------------------------|----------------------------------------------------------------------------------------------------|
|  | Gait speed (2.4m, 4m, 6m and 15.24m)                                                                                                             | (IADL); mobility limitations | 1.8), for persistent severe mobility disability.                                                                                                        | of disability in IADL and mobility limitations.                                                    |
|  |                                                                                                                                                  |                              | Slower gait speed, 2.4m ( $\geq 9$ s in total): OR=3.4 (1.8–6.5); 6–8s: OR=2.6 (1.4–4.9); 4–5s: OR=2.1 (1.2–4.0), for mobility limitations.             |                                                                                                    |
|  |                                                                                                                                                  |                              | Fastest gait speed: OR=7.9, $p=0.04$ , for mobility limitations.                                                                                        |                                                                                                    |
|  | Postural balance (semi-tandem stance, tandem stance one-leg stance, 30s/test (0–90s); side-by-side, semi-tandem stance, tandem stance, 10s/test) |                              | Gait speed, 2.4m ( $\geq 9$ s in total): OR=5.4 (1.2–23.6), for IADL.                                                                                   | Balance tests identified preclinical disability due to disability in IADL and mobility disability. |
|  |                                                                                                                                                  |                              | Gait speed, 4m ( $< 0.6$ m/s): 12 months, OR=0.5 (0.02–16.00); 18 months, OR=0.2 (0.01–8.79), for IADL.                                                 |                                                                                                    |
|  | TUG                                                                                                                                              |                              | Total balance test ( $< 53$ s): HR=1.6 (1.4–1.8), for persistent mobility disability; and HR=1.85 (1.6–2.2), for persistent severe mobility disability. | The tug test did not identify preclinical disability in mobility and IADL.                         |
|  |                                                                                                                                                  |                              | Tandem stance ( $> 2$ – $< 10$ s): OR=1.6 (1.1–2.6), for mobility disability.                                                                           |                                                                                                    |

|                                              |                                                                       |       |                                                                                                                                                                                          |                               |                                                                                                                                                                                                                                                                                                                        |                                                                                         |
|----------------------------------------------|-----------------------------------------------------------------------|-------|------------------------------------------------------------------------------------------------------------------------------------------------------------------------------------------|-------------------------------|------------------------------------------------------------------------------------------------------------------------------------------------------------------------------------------------------------------------------------------------------------------------------------------------------------------------|-----------------------------------------------------------------------------------------|
| Van Kan et al.<br>2009 [2]                   | Systematic<br>review<br>K = 10                                        | ≥65   | Gait speed (2.4m, 4m,<br>4.6m, 4.9m, 6m, 11m and<br>400m)                                                                                                                                | IADL; mobility<br>limitations | Tandem stance (>2-<10s):<br>OR=2.5 (1.2-4.8), for IADL.<br><br>TUG: OR=1.1, $p=0.24$ , for<br>mobility disability.<br><br>Slower gait speed (<1m/s):<br>RR ranging from 0.7 to 6.1<br>(0.5-23.6), for IADL.<br><br>Slower gait speed (<1m/s):<br>RR ranging from 0.6 to 2.1<br>(0.9-6.5), for mobility<br>limitations. | Slow gait speed was found to<br>predict disability in IADL and<br>mobility limitations. |
| Wang et al. 2020<br>[6]                      | Systematic<br>review<br>K = 62<br><br>Meta-<br>analysis<br><br>K = 45 | 54-86 | Gait speed ( <i>unreported<br/>distances</i> )<br><br>Postural balance (Berg<br>Balance Scale, one-leg<br>stance (5s), side-by-side,<br>semi-tandem stance,<br>tandem stance)<br><br>TUG | IADL                          | Slower gait speed (<1m/s):<br>OR=4.4 (1.3–14.5).<br><br>One-leg balance stance<br>(<5s): OR=2.7 (1.3–5.7).<br><br>Worse TUG performance<br>(>12s): OR=3.4 (1.9–6.3).                                                                                                                                                   | Worse physical performance in<br>gait speed, one-leg balance or<br>TUG predicted IADL.  |
| <b>Hospitalization/ institutionalisation</b> |                                                                       |       |                                                                                                                                                                                          |                               |                                                                                                                                                                                                                                                                                                                        |                                                                                         |
| Cavanaugh et<br>al. 2018 [1]                 | Systematic<br>review<br><br>K = 2                                     | ≥60   | Gait speed (6m)<br><br>Postural balance ((semi-<br>tandem stance, tandem                                                                                                                 | Hospitalization               | Slower gait speed (<1m/s):<br>HR=1.3 (1.0–1.6).                                                                                                                                                                                                                                                                        | Slow gait speed and impairment<br>balance identified hospitalization.                   |

|                            |                               |     |                                             |                                                |                                                                         |                                                                                     |
|----------------------------|-------------------------------|-----|---------------------------------------------|------------------------------------------------|-------------------------------------------------------------------------|-------------------------------------------------------------------------------------|
|                            |                               |     | stance one-leg stance,<br>30s/test (0-90s)) |                                                | Total balance (<53s): HR=1.4<br>(1.1-1.7).                              |                                                                                     |
| Van Kan et al.<br>2009 [2] | Systematic<br>review<br>K = 5 | ≥65 | Gait speed (4m, 4.9m,<br>6m, 10m)           | Institutionalisatio<br>n or<br>hospitalization | Slower gait speed (<1m/s):<br>RR ranging from 1.0 to 5.9<br>(1.0-18.5). | Slow gait speed was found to<br>predict institutionalisation or<br>hospitalization. |
| Mortality                  |                               |     |                                             |                                                |                                                                         |                                                                                     |
| Van Kan et al.<br>2009 [2] | Systematic<br>review<br>K = 9 | ≥65 | Gait speed (2.4m, 4m,<br>4.6m, 4.9m and 6m) | All-cause<br>mortality                         | Slower gait speed (<1m/s):<br>RR ranging from 0.7 to 7.4<br>(0.5-14.5). | Slow gait speed was found to<br>predict mortality.                                  |

B, non-standardized regression coefficient; FRT, Functional Reach Test; HR, Hazard Ratio; IADL, Disability in Instrumental Activities of Daily Living; OR, Odd Ratio; RR, relative risk; TUG, Timed Up&Go test.

## REFERENCES

1. Cavanaugh EJ, Richardson J, McCallum CA, Wilhelm M. The Predictive Validity of Physical Performance Measures in Determining Markers of Preclinical Disability in Community-Dwelling Middle-Aged and Older Adults: A Systematic Review. *Physical Therapy*. 2018;98(12):1010-21.
2. van Kan GA, Rolland Y, Andrieu S, Bauer J, Beauchet O, Bonnefoy M, et al. GAIT SPEED AT USUAL PACE AS A PREDICTOR OF ADVERSE OUTCOMES IN COMMUNITY-DWELLING OLDER PEOPLE AN INTERNATIONAL ACADEMY ON NUTRITION AND AGING (IANA) TASK FORCE. *Journal of Nutrition Health & Aging*. 2009;13(10):881-9.
3. Quan MH, Xun PC, Chen C, Wen J, Wang YY, Wang R, et al. Walking Pace and the Risk of Cognitive Decline and Dementia in Elderly Populations: A Meta-analysis of Prospective Cohort Studies. *Journals of Gerontology Series a-Biological Sciences and Medical Sciences*. 2017;72(2):266-70.
4. Grande G, Triolo F, Nuara A, Welmer AK, Fratiglioni L, Vetrano DL. Measuring gait speed to better identify prodromal dementia. *Experimental Gerontology*. 2019;124.
5. Peel NM, Alapatt LJ, Jones LV, Hubbard RE. The Association Between Gait Speed and Cognitive Status in Community-Dwelling Older People: A Systematic Review and Meta-analysis. *Journals of Gerontology Series a-Biological Sciences and Medical Sciences*. 2019;74(6):943-8.
6. Wang DXM, Yao J, Zirek Y, Reijnierse EM, Maier AB. Muscle mass, strength, and physical performance predicting activities of daily living: a meta-analysis. *Journal of Cachexia Sarcopenia and Muscle*. 2020;11(1):3-25.
